# Supplementary material for: MicroRNA profiling associated with muscle growth in modern broilers compared to an unselected chicken breed
Source: BMC Genomics. 2018 Sep 17;19:683. doi: 10.1186/s12864-018-5061-7 (PMC6142689; doi:10.1186/s12864-018-5061-7)
Supplement: Supplementary file 2 — Target mRNAs of differentially expressed and qPCR validated miRNAs in PeM and BPR comparison. (XLSX 20 kb) [file 12864_2018_5061_MOESM2_ESM.xlsx]

## Sheet: Target_genes
Target mRNAs of differentially expressed and qPCR validated miRNAs in PeM and BPR comparison
Target Rank	Target Score	miRNA Name	Target Gene	Gene Description	Fold Change(RNASeq)	p-value	Location	Type(s)
5	100	gga-let-7b	IGF2BP3	insulin-like growth factor 2 mRNA binding protein 3	-1.85	0.0014	Cytoplasm	translation regulator
80	96	gga-let-7b	ACER2	alkaline ceramidase 2	-1.74	0.00644	Cytoplasm	enzyme
139	94	gga-let-7b	FGD6	FYVE, RhoGEF and PH domain containing 6	-1.5	0.0342	Cytoplasm	other
163	93	gga-let-7b	FOXP2	forkhead box P2	-1.88	0.00815	Nucleus	transcription regulator
271	88	gga-let-7b	MGAT4A	mannosyl (alpha-1,3-)-glycoprotein beta-1,4-N-acetylglucosaminyltransferase, isozyme A	-1.54	0.0102	Cytoplasm	enzyme
325	86	gga-let-7b	SLC2A12	solute carrier family 2 (facilitated glucose transporter), member 12	-1.34	0.00845	Plasma Membrane	transporter
403	83	gga-let-7b	KLHL13	kelch-like 9 (Drosophila)	-1.32	0.000988	Other	other
457	81	gga-let-7b	GATM	glycine amidinotransferase (L-arginine:glycine amidinotransferase)	-3.81	8.22e-05	Cytoplasm	enzyme
555	78	gga-let-7b	PDP2	pyruvate dehyrogenase phosphatase catalytic subunit 2	-1.82	0.00558	Cytoplasm	phosphatase
643	75	gga-let-7b	KIAA1467	KIAA1467	-1.38	0.036	Other	other
645	75	gga-let-7b	TMEM56	transmembrane protein 56	-2.81	0.00544	Other	other
676	74	gga-let-7b	SNX16	sorting nexin 16	-1.32	0.0112	Other	transporter
1012	64	gga-let-7b	WDR37	WD repeat domain 37	-1.57	0.0122	Other	other
1064	63	gga-let-7b	PNAT10	N-acetyltransferase, pineal gland isozyme NAT-10	-4.47	8.27e-05
1153	61	gga-let-7b	TMEM164	transmembrane protein 164	-1.93	0.00347	Other	other
1154	61	gga-let-7b	NNT	nicotinamide nucleotide transhydrogenase	-1.75	4.02e-06	Cytoplasm	enzyme
1196	60	gga-let-7b	GTF3C6	general transcription factor IIIC, polypeptide 6, alpha 35kDa	-1.56	0.00662	Nucleus	transcription regulator
1234	59	gga-let-7b	SLC30A1	solute carrier family 30 (zinc transporter), member 1	1.46	0.0253	Plasma Membrane	transporter
1307	57	gga-let-7b	AFF2	AF4/FMR2 family, member 2	-1.46	0.00434	Nucleus	other
1394	55	gga-let-7b	EEF2K	eukaryotic elongation factor-2 kinase	-1.87	0.0068	Cytoplasm	kinase
1395	55	gga-let-7b	AQP4	aquaporin 4	-2.97	0.0179	Plasma Membrane	transporter
1443	54	gga-let-7b	SALL4	sal-like 4 (Drosophila)	-2.59	0.0028	Nucleus	transcription regulator
415	83	gga-miR-10a-5p	SLC35E1	solute carrier family 35, member E1	-1.33	0.000524	Other	other
1041	64	gga-miR-10a-5p	HDAC11	histone deacetylase 11	-1.37	0.00311	Nucleus	transcription regulator
1044	64	gga-miR-10a-5p	NAA50	N(alpha)-acetyltransferase 50, NatE catalytic subunit	-1.51	0.00299	Cytoplasm	enzyme
1140	62	gga-miR-10a-5p	RNPC3	RNA-binding region (RNP1, RRM) containing 3	-1.3	0.00846	Nucleus	other
1259	59	gga-miR-10a-5p	MFAP3	microfibrillar-associated protein 3	-1.43	0.000123	Extracellular Space	other
1475	54	gga-miR-10a-5p	SLC35D1	solute carrier family 35 (UDP-glucuronic acid/UDP-N-acetylgalactosamine dual transporter), member D1	-1.82	0.00041	Cytoplasm	transporter
1532	53	gga-miR-10a-5p	HSPA13	heat shock protein 70kDa family, member 13	-1.45	0.0028	Cytoplasm	other
1637	51	gga-miR-10a-5p	KLF11	Kruppel-like factor 11	-1.4	0.016	Nucleus	transcription regulator
113	95	gga-miR-125b-5p	KLF13	Kruppel-like factor 13	-2.01	2.72e-05	Nucleus	transcription regulator
167	93	gga-miR-125b-5p	ZFYVE1	zinc finger, FYVE domain containing 1	-1.31	0.00351	Cytoplasm	other
203	91	gga-miR-125b-5p	LRRC8B	leucine rich repeat containing 8 family, member B	-3.03	2.87e-07	Other	other
253	89	gga-miR-125b-5p	TLE3	transducin-like enhancer of split 3 (E(sp1) homolog, Drosophila)	-1.43	0.00136	Nucleus	other
272	88	gga-miR-125b-5p	ELOVL6	ELOVL fatty acid elongase 6	-2.13	0.0271	Cytoplasm	enzyme
304	87	gga-miR-125b-5p	TMEM184B	transmembrane protein 184B	-1.59	0.00379	Other	other
460	81	gga-miR-125b-5p	TMTC2	transmembrane and tetratricopeptide repeat containing 2	-1.35	0.00622	Cytoplasm	other
490	80	gga-miR-125b-5p	TTPA	tocopherol (alpha) transfer protein	-1.95	0.0393	Cytoplasm	transporter
491	80	gga-miR-125b-5p	ZNRF3	zinc and ring finger 3	-2.06	0.00299	Plasma Membrane	enzyme
948	66	gga-miR-125b-5p	TMEM161B	transmembrane protein 161B	-1.64	0.0381	Other	other
1454	54	gga-miR-125b-5p	ATMIN	ATM interactor	-1.63	0.0151	Nucleus	other
285	88	gga-miR-146	PLEKHM3	pleckstrin homology domain containing, family M, member 3	-1.64	0.00373	Other	other
286	88	gga-miR-146	ZBTB2	zinc finger and BTB domain containing 2	-1.37	0.0168	Nucleus	other
411	83	gga-miR-146	GIN1	gypsy retrotransposon integrase 1	-1.66	0.0128	Other	other
699	74	gga-miR-146	GDNF	glial cell derived neurotrophic factor	-1.88	0.0157	Extracellular Space	growth factor
759	72	gga-miR-146	KBTBD2	kelch repeat and BTB (POZ) domain containing 2	-1.3	0.00809	Other	other
818	70	gga-miR-146	PTPN21	protein tyrosine phosphatase, non-receptor type 21	-2.14	0.0206	Cytoplasm	phosphatase
819	70	gga-miR-146	MYSM1	myb-like, SWIRM and MPN domains 1	-1.51	0.0469	Nucleus	enzyme
1258	59	gga-miR-146	TM7SF3	transmembrane 7 superfamily member 3	-1.57	0.000276	Plasma Membrane	other
1421	55	gga-miR-146	FAM168B	family with sequence similarity 168, member B	-1.52	0.045	Cytoplasm	other
1685	50	gga-miR-146	ZNRF3	zinc and ring finger 3	-2.06	0.00299	Plasma Membrane	enzyme
3	100	gga-miR-206	GLCCI1	glucocorticoid induced transcript 1	1.83	3.57e-06	Cytoplasm	other
72	96	gga-miR-206	CNN3	calponin 3, acidic	1.38	0.0109	Cytoplasm	other
74	96	gga-miR-206	EIF2AK3	eukaryotic translation initiation factor 2-alpha kinase 3	1.39	0.0103	Cytoplasm	kinase
103	95	gga-miR-206	SNAI2	snail homolog 2 (Drosophila)	1.66	0.0318	Nucleus	transcription regulator
215	90	gga-miR-206	RASSF2	Ras association (RalGDS/AF-6) domain family member 2	1.92	0.000959	Nucleus	other
222	90	gga-miR-206	MEOX2	mesenchyme homeobox 2	1.51	0.0294	Nucleus	transcription regulator
262	88	gga-miR-206	UTRN	utrophin	1.36	0.0277	Plasma Membrane	transmembrane receptor
295	87	gga-miR-206	RRBP1	ribosome binding protein 1 homolog 180kDa (dog)	1.74	0.000101	Cytoplasm	other
320	86	gga-miR-206	SULF1	sulfatase 1	1.65	0.0117	Cytoplasm	enzyme
343	85	gga-miR-206	SPRED1	sprouty-related, EVH1 domain containing 1	1.32	0.00912	Plasma Membrane	other
344	85	gga-miR-206	EMP1	epithelial membrane protein 1	2.07	0.00638	Plasma Membrane	other
345	85	gga-miR-206	RSPO3	R-spondin 3	5.39	0.000156	Extracellular Space	kinase
370	84	gga-miR-206	DAP	death-associated protein	1.61	0.00932	Cytoplasm	transcription regulator
422	82	gga-miR-206	THBS1	thrombospondin 1	5.21	4.54e-05	Extracellular Space	other
638	75	gga-miR-206	SLC25A22	solute carrier family 25 (mitochondrial carrier: glutamate), member 22	1.8	0.0314	Cytoplasm	transporter
639	75	gga-miR-206	ARAP2	ArfGAP with RhoGAP domain, ankyrin repeat and PH domain 2	2.35	0.00518	Cytoplasm	other
670	74	gga-miR-206	FAM150B	family with sequence similarity 150, member B	1.8	0.0344	Other	other
711	73	gga-miR-206	GSTT1	glutathione S-transferase theta 1	1.88	0.000829	Cytoplasm	enzyme
794	70	gga-miR-206	CCBE1	collagen and calcium binding EGF domains 1	1.53	0.00467	Extracellular Space	other
829	69	gga-miR-206	TPM3	tropomyosin 3	2.25	0.000142	Cytoplasm	other
862	68	gga-miR-206	SYK	spleen tyrosine kinase	2.62	0.00715	Cytoplasm	kinase
866	68	gga-miR-206	ANXA2	annexin A2	4.11	6.43e-05	Plasma Membrane	other
867	68	gga-miR-206	SNX4	sorting nexin 4	1.43	0.00052	Cytoplasm	transporter
936	66	gga-miR-206	FAM126A	family with sequence similarity 126, member A	1.36	0.00702	Cytoplasm	other
976	65	gga-miR-206	SOWAHC	sosondowah ankyrin repeat domain family member C	1.51	0.0279	Nucleus	transcription regulator
1052	63	gga-miR-206	CORO1C	coronin, actin binding protein, 1C	1.83	0.000261	Cytoplasm	other
1144	61	gga-miR-206	PSAT1	phosphoserine aminotransferase 1	1.64	0.000216	Cytoplasm	enzyme
1226	59	gga-miR-206	HTRA1	HtrA serine peptidase 1	2.27	0.00758	Extracellular Space	peptidase
1227	59	gga-miR-206	OGN	osteoglycin	2.28	0.000403	Extracellular Space	growth factor
1389	55	gga-miR-206	PDIA5	protein disulfide isomerase family A, member 5	1.32	0.00909	Cytoplasm	enzyme
1429	54	gga-miR-206	GPR137B	G protein-coupled receptor 137B	1.77	0.000358	Plasma Membrane	other
1430	54	gga-miR-206	OSBPL5	oxysterol binding protein-like 5	1.46	0.0156	Cytoplasm	other
1433	54	gga-miR-206	ARSJ	arylsulfatase family, member J	5.21	1.47e-06	Extracellular Space	enzyme
1490	53	gga-miR-206	BMP6	bone morphogenetic protein 6	1.53	0.0127	Extracellular Space	growth factor
1647	50	gga-miR-206	SVEP1	sushi, von Willebrand factor type A, EGF and pentraxin domain containing 1	1.73	0.00134	Cytoplasm	other
91	96	gga-miR-2131-5p	H2AFZ	H2A histone family, member Z	-1.34	0.00621	Nucleus	other
92	96	gga-miR-2131-5p	NCOR1	nuclear receptor corepressor 1	-1.66	0.000706	Nucleus	transcription regulator
117	95	gga-miR-2131-5p	KBTBD8	kelch repeat and BTB (POZ) domain containing 8	-1.72	0.0027	Other	other
171	93	gga-miR-2131-5p	LAPTM4B	lysosomal protein transmembrane 4 beta	-1.77	0.0015	Other	other
187	92	gga-miR-2131-5p	LIG4	ligase IV, DNA, ATP-dependent	-1.54	0.00213	Nucleus	enzyme
205	91	gga-miR-2131-5p	EPG5	ectopic P-granules autophagy protein 5 homolog (C. elegans)	-1.47	0.0367	Other	other
210	91	gga-miR-2131-5p	ISOC1	isochorismatase domain containing 1	-1.32	0.0229	Cytoplasm	enzyme
277	88	gga-miR-2131-5p	HSPA13	heat shock protein 70kDa family, member 13	-1.45	0.0028	Cytoplasm	other
284	88	gga-miR-2131-5p	RAP1B	RAP1B, member of RAS oncogene family	1.34	1.65e-05	Cytoplasm	enzyme
313	87	gga-miR-2131-5p	CHN2	chimerin (chimaerin) 2	-1.78	0.0404	Cytoplasm	other
334	86	gga-miR-2131-5p	GTF2A1	general transcription factor IIA, 1, 19/37kDa	-1.6	3.02e-05	Cytoplasm	transcription regulator
354	85	gga-miR-2131-5p	NR3C2	nuclear receptor subfamily 3, group C, member 2	-1.5	0.00419	Nucleus	ligand-dependent nuclear receptor
429	82	gga-miR-2131-5p	RNGTT	RNA guanylyltransferase and 5'-phosphatase	-1.54	0.00655	Nucleus	phosphatase
432	82	gga-miR-2131-5p	LNPEP	leucyl/cystinyl aminopeptidase	-2	0.0286	Cytoplasm	peptidase
468	81	gga-miR-2131-5p	SP4	Sp4 transcription factor	-1.35	0.00323	Nucleus	transcription regulator
470	81	gga-miR-2131-5p	SNX2	sorting nexin 2	-1.3	0.0057	Cytoplasm	transporter
494	80	gga-miR-2131-5p	SLC19A2	solute carrier family 19 (thiamine transporter), member 2	-1.84	0.00804	Plasma Membrane	transporter
498	80	gga-miR-2131-5p	MSMO1	methylsterol monooxygenase 1	-1.61	0.00916	Cytoplasm	enzyme
520	79	gga-miR-2131-5p	WDR51B	WD repeat domain 51B	-1.87	0.000903	Cytoplasm	other
527	79	gga-miR-2131-5p	MTMR7	myotubularin related protein 7	-2.06	0.00172	Cytoplasm	phosphatase
560	78	gga-miR-2131-5p	RRP1B	ribosomal RNA processing 1 homolog B (S. cerevisiae)	-1.41	0.0014	Nucleus	other
562	78	gga-miR-2131-5p	ZNF770	zinc finger protein 770	-1.53	0.0167	Other	other
563	78	gga-miR-2131-5p	LGALSL	lectin, galactoside-binding-like	-1.4	0.00442	Other	other
598	77	gga-miR-2131-5p	PDP2	pyruvate dehyrogenase phosphatase catalytic subunit 2	-1.82	0.00558	Cytoplasm	phosphatase
620	76	gga-miR-2131-5p	RHOBTB3	Rho-related BTB domain containing 3	-2.31	0.00644	Cytoplasm	enzyme
654	75	gga-miR-2131-5p	CHAF1B	chromatin assembly factor 1, subunit B (p60)	-1.4	0.00467	Nucleus	other
694	74	gga-miR-2131-5p	NUDT6	nudix (nucleoside diphosphate linked moiety X)-type motif 6	-1.4	0.0126	Extracellular Space	growth factor
721	73	gga-miR-2131-5p	PKNOX1	PBX/knotted 1 homeobox 1	-1.79	0.00799	Nucleus	transcription regulator
725	73	gga-miR-2131-5p	TECPR1	tectonin beta-propeller repeat containing 1	-1.4	0.0294	Cytoplasm	other
757	72	gga-miR-2131-5p	PDS5A	PDS5, regulator of cohesion maintenance, homolog A (S. cerevisiae)	-1.36	0.00167	Nucleus	other
775	71	gga-miR-2131-5p	FOXP2	forkhead box P2	-1.88	0.00815	Nucleus	transcription regulator
808	70	gga-miR-2131-5p	FAM98B	family with sequence similarity 98, member B	-1.38	7.81e-05	Other	other
815	70	gga-miR-2131-5p	MLLT10	myeloid/lymphoid or mixed-lineage leukemia (trithorax homolog, Drosophila); translocated to, 10	-1.38	4.51e-05	Nucleus	transcription regulator
851	69	gga-miR-2131-5p	GFOD1	glucose-fructose oxidoreductase domain containing 1	-1.45	0.0374	Other	enzyme
921	67	gga-miR-2131-5p	ROCK2	Rho-associated, coiled-coil containing protein kinase 2	-2.07	0.00366	Cytoplasm	kinase
960	66	gga-miR-2131-5p	TRIM23	tripartite motif containing 23	-1.3	0.0189	Nucleus	enzyme
989	65	gga-miR-2131-5p	AQP9	aquaporin 9	-3.41	0.00566	Plasma Membrane	transporter
1074	63	gga-miR-2131-5p	CASC4	cancer susceptibility candidate 4	-1.4	7.1e-05	Cytoplasm	other
1086	63	gga-miR-2131-5p	ADAMTS20	ADAM metallopeptidase with thrombospondin type 1 motif, 20	-1.65	0.0187	Extracellular Space	peptidase
1119	62	gga-miR-2131-5p	ZBTB24	zinc finger and BTB domain containing 24	-1.49	0.0012	Nucleus	other
1128	62	gga-miR-2131-5p	DENND1B	DENN/MADD domain containing 1B	-1.41	0.0271	Other	other
1164	61	gga-miR-2131-5p	B9D1	B9 protein domain 1	-1.61	0.0418	Extracellular Space	other
1169	61	gga-miR-2131-5p	CLOCK	clock homolog (mouse)	-1.77	0.0419	Nucleus	transcription regulator
1175	61	gga-miR-2131-5p	SLC44A5	solute carrier family 44, member 5	-1.89	0.0092	Plasma Membrane	transporter
1207	60	gga-miR-2131-5p	ARV1	ARV1 homolog (S. cerevisiae)	-1.56	0.00033	Cytoplasm	other
1248	59	gga-miR-2131-5p	LATS2	LATS, large tumor suppressor, homolog 2 (Drosophila)	-1.32	0.0101	Nucleus	kinase
1286	58	gga-miR-2131-5p	BMP7	bone morphogenetic protein 7	-1.95	0.0177	Extracellular Space	growth factor
1328	57	gga-miR-2131-5p	BTBD3	BTB (POZ) domain containing 3	-2.13	0.00123	Other	other
1330	57	gga-miR-2131-5p	PFKFB2	6-phosphofructo-2-kinase/fructose-2,6-biphosphatase 2	-1.57	0.0431	Cytoplasm	kinase
1362	56	gga-miR-2131-5p	COL9A3	collagen, type IX, alpha 3	-3.23	0.00067	Extracellular Space	other
1407	55	gga-miR-2131-5p	CRKL	v-crk sarcoma virus CT10 oncogene homolog-like	-1.32	0.0137	Cytoplasm	kinase
1412	55	gga-miR-2131-5p	CLSPN	claspin	-1.41	0.0389	Nucleus	other
1415	55	gga-miR-2131-5p	KNTC1	kinetochore associated 1	-2.06	0.00333	Nucleus	other
1461	54	gga-miR-2131-5p	MOB4	MOB family member 4, phocein	-1.31	5.48e-05	Cytoplasm	other
1563	52	gga-miR-2131-5p	USP24	ubiquitin specific peptidase 24	-1.82	0.0362	Other	peptidase
1564	52	gga-miR-2131-5p	SNX16	sorting nexin 16	-1.32	0.0112	Other	transporter
1570	52	gga-miR-2131-5p	PDXK	pyridoxal (pyridoxine, vitamin B6) kinase	-2.13	0.00621	Cytoplasm	kinase
1633	51	gga-miR-2131-5p	NFATC1	nuclear factor of activated T-cells, cytoplasmic, calcineurin-dependent 1	-1.67	0.012	Nucleus	transcription regulator
1673	50	gga-miR-2131-5p	MBP	myelin basic protein	-2.62	0.000196	Extracellular Space	other
264	88	gga-miR-221-5p	SLC7A2	solute carrier family 7 (cationic amino acid transporter, y+ system), member 2	-2.03	0.000519	Plasma Membrane	transporter
613	76	gga-miR-221-5p	CRIPT	cysteine-rich PDZ-binding protein	-1.33	0.000371	Cytoplasm	other
836	69	gga-miR-221-5p	AFF4	AF4/FMR2 family, member 4	-1.43	0.0396	Nucleus	transcription regulator
872	68	gga-miR-221-5p	TK2	thymidine kinase 2, mitochondrial	-1.45	0.000463	Cytoplasm	kinase
1306	57	gga-miR-221-5p	RGMB	RGM domain family, member B	-1.35	0.0301	Plasma Membrane	other
1392	55	gga-miR-221-5p	SLC12A2	solute carrier family 12 (sodium/potassium/chloride transporters), member 2	-1.8	0.00288	Plasma Membrane	transporter
1393	55	gga-miR-221-5p	PDS5A	PDS5, regulator of cohesion maintenance, homolog A (S. cerevisiae)	-1.36	0.00167	Nucleus	other
1655	50	gga-miR-221-5p	CLOCK	clock homolog (mouse)	-1.77	0.0419	Nucleus	transcription regulator
